# Supplementary material
Source: ML conference proceedings conference paper supplement (https://openaccess.thecvf.com/content/cvpr_2015/html/Reininghaus_A_Stable_Multi-Scale_2015_CVPR_paper.html)
Supplement: Supplementary file 1 [file Reininghaus_A_Stable_Multi-Scale_2015_CVPR_supplemental.zip]

```

1  -----
2  Counterexample #1
3  Distance:  $d_{\{W,1\}}$ 
4  Gram matrix size: 15 x 15
5  -----
6  #pos. EVs: 2
7      0.5040571300
8      110.4146051286
9  #neg. EVs: 13
10     -33.0534918854
11     -25.6547174405
12     -14.8196459652
13     -8.9240678596
14     -6.2857928695
15     -5.3320505871
16     -4.6148924811
17     -3.8663241503
18     -3.2118878003
19     -2.0848212722
20     -1.3406497828
21     -1.2239462158
22     -0.5063739487
23  -----
24  Counterexample #2
25  Distance:  $d_{\{W,2\}}$ 
26  Gram matrix size: 20 x 20
27  -----
28  #pos. EVs: 2
29      0.1110393203
30      106.5708842537
31  #neg. EVs: 18
32     -28.1496609411
33     -16.6029017154
34     -13.8188081638
35     -9.1267812027
36     -7.3521617798
37     -5.9265407943
38     -4.7836437770
39     -3.9037195847
40     -3.6452813054
41     -2.8222325217
42     -2.4177474102
43     -1.9864798876
44     -1.7952275649
45     -1.4387060350
46     -1.1471364816
47     -0.9673436804
48     -0.6326474923
49     -0.1649032362
50  -----
51  Counterexample #3
52  Distance:  $d_{\{W,3\}}$ 
53  Gram matrix size: 20 x 20
54  -----
55  #pos. EVs: 2
56      0.6050671397
57      108.3558861911
58  #neg. EVs: 18

```

```

59      -24.5358660128
60      -19.4997519954
61      -15.1409637715
62      -10.6880693650
63      -6.8402724704
64      -5.4077854008
65      -4.4290056701
66      -4.2202050255
67      -3.8225903219
68      -3.0828151303
69      -2.6239139095
70      -2.0447717466
71      -1.9550498930
72      -1.5874389735
73      -1.2952716942
74      -1.0590800950
75      -0.6383826166
76      -0.0897192385
77 -----
78 Counterexample #4
79 Distance:  $d_{\{W,4\}}$ 
80 Gram matrix size: 20 x 20
81 -----
82 #pos. EVs: 3
83     0.1570980082
84     0.8357003927
85     100.5133080712
86 #neg. EVs: 17
87     -25.2458650392
88     -15.7708190900
89     -12.2811384593
90     -11.2868343240
91     -7.7660828093
92     -6.6867199822
93     -4.9182255172
94     -3.3519254154
95     -2.8554464785
96     -2.6551954896
97     -2.4003540549
98     -1.7859240195
99     -1.5630490598
100     -0.9969220064
101     -0.8084981215
102     -0.7285706717
103     -0.4045359338
104 -----
105 Counterexample #5
106 Distance:  $d_B$ 
107 Gram matrix size: 10 x 10
108 -----
109 #pos. EVs: 2
110     0.7403750597
111     56.9302456586
112 #neg. EVs: 8
113     -14.6356147726
114     -12.5953657783
115     -10.5455256595
116     -6.7188814931

```

|     |               |
|-----|---------------|
| 117 | -6.0088600574 |
| 118 | -3.8609128053 |
| 119 | -2.2556209970 |
| 120 | -1.0498391551 |
